# Supplementary material for: Reduction of NO with Fe(ii) and subsequent regeneration of Fe(ii) in a fuel cell
Source: Royal Society of Chemistry journal article supplement (doi:10.1039/c2ra21750c), 2012-01-01
Supplement: c2ra21750c.pdf [file c2ra21750c.pdf]

## Supporting Information

# Reduction of NO with Fe(II) and subsequent regeneration of Fe(II) in fuel cell

*Sang-Beom Han, Young-Woo Lee, Si-Jin Kim, Do-Young Kim,*

*A-Ra Ko and Kyung-Won Park\**

Department of Chemical Engineering, Soongsil University, Seoul 156-743, Republic of

Korea

E-mail address: kwpark@ssu.ac.kr

## Experimental Section

**Synthesis of non-precious catalyst.** To synthesize N-doped carbon, a solution of 1 mM iron (III) nitrate and 3 mM melamine ( $C_3H_6N_6$ ) was prepared by dissolving in a mixture solution of ethylene glycol and ethanol (50:50) as described in the previous study.<sup>8</sup> The solution (3 mL) was then added to 0.2 g of carbon black (Vulcan XC-72R) at 25 °C. After the continuous stirring and sonicating for 1 h, the solution was completely evaporated and then the resulting powder was dried at 50 °C. The obtained powder was placed in a quartz boat and heat-treated at 700 °C for 3 h in a horizontal quartz furnace under  $N_2$  atmosphere.

**NO reduction measurements.** A solution of 1 M  $FeSO_4$  and 2 M  $H_2SO_4$  was prepared in 1000 mL of deionized water. The solution was continuously stirred and purged with NO (5% NO in a balance  $N_2$ ) until completely saturated. The change of color in the saturated solutions was observed at 50 and 80 °C.

The NO reduction rates of the solutions were studied by UV-Vis absorbance spectroscopy ( $\lambda=454$  nm). The selectivity of NO reduction reaction was measured by calibrating UV-Vis absorbance at  $\lambda=190$  nm. The spectra were recorded at 25 °C using a Jasco V-650 spectrophotometer.<sup>7</sup>

**Electrochemical measurements.** To characterize electrochemical properties of Fe<sup>2+</sup>/Fe<sup>3+</sup> redox couples, electrochemical measurements were carried out in a three-electrode cell using a potentiostat (Eco Chemie, AUTOLAB) at 25 °C. The N-doped carbon catalyst-coated rotating disc electrode, a Pt wire, and Ag/AgCl were used as working, counter, and reference electrode, respectively. All potentials are reported with respect to Ag/AgCl.

**Electrochemical cell measurements.** The performance of electrochemical cell was evaluated using membrane-electrode-assembly (MEA) and computer-controlled electronic load (CNLP005-01, CNL Energy Co.). The catalysts used at the anode and cathode were applied on carbon papers (Toray Co.) by brushing method. The solid polymer electrolyte was a Nafion 117 (DuPont Co.), which was pretreated with H<sub>2</sub>O<sub>2</sub> and H<sub>2</sub>SO<sub>4</sub> solutions. The MEA was prepared by hot pressing (110 °C, 55 atm) for 2 min. The MEA with an active area of 2 cm<sup>2</sup> was placed between the graphite plates with serpentine flow-field and then the whole unit was tightened between the metal plates with the proper pressure. The electrochemical cell performance was characterized at 70 °C with Pt/C (E-TEK, 0.5 mg cm<sup>-2</sup>) at anode and N-doped carbon (1.0 mg cm<sup>-2</sup>) at cathode. The H<sub>2</sub> gas humidified at 70 °C was supplied at anode with a flow rate of 27.8 mL min<sup>-1</sup>. The Fe-NO solution kept at 80 °C for 4 h was flowed at cathode with a flow rate of 2 mL min<sup>-1</sup>.

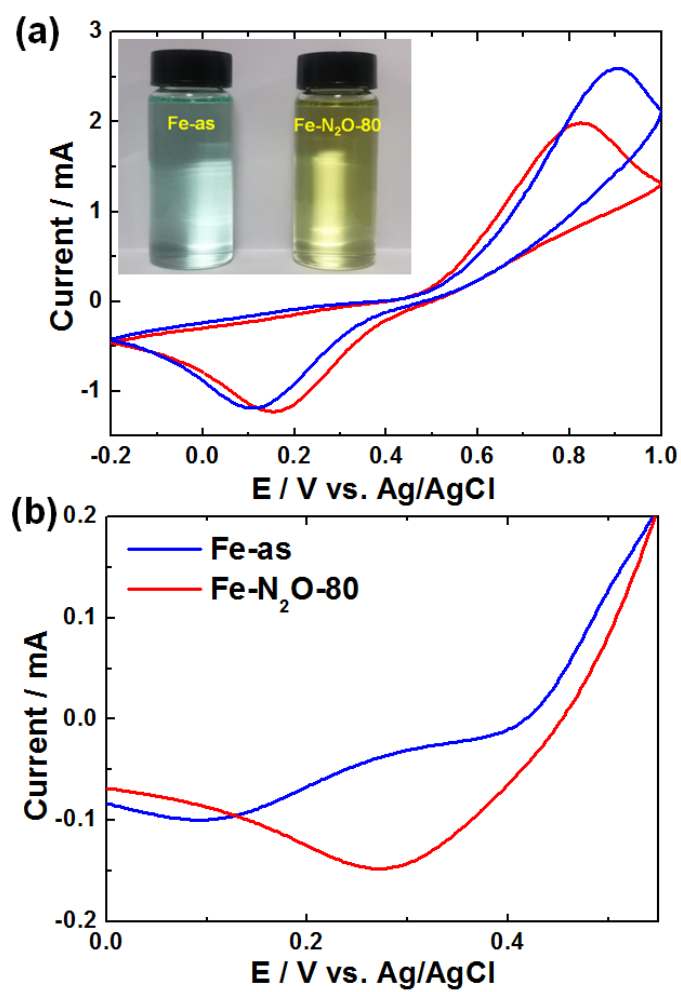

**Figure S1.** Electrochemical reduction reactions on N-doped carbon in N<sub>2</sub>O(100%)-absorbed solution for 4h at 80 °C (referred to as Fe-N<sub>2</sub>O-80). (a) Cyclic and (b) linear sweep voltammograms for iron reduction reactions in Fe-as and Fe-N<sub>2</sub>O-80.

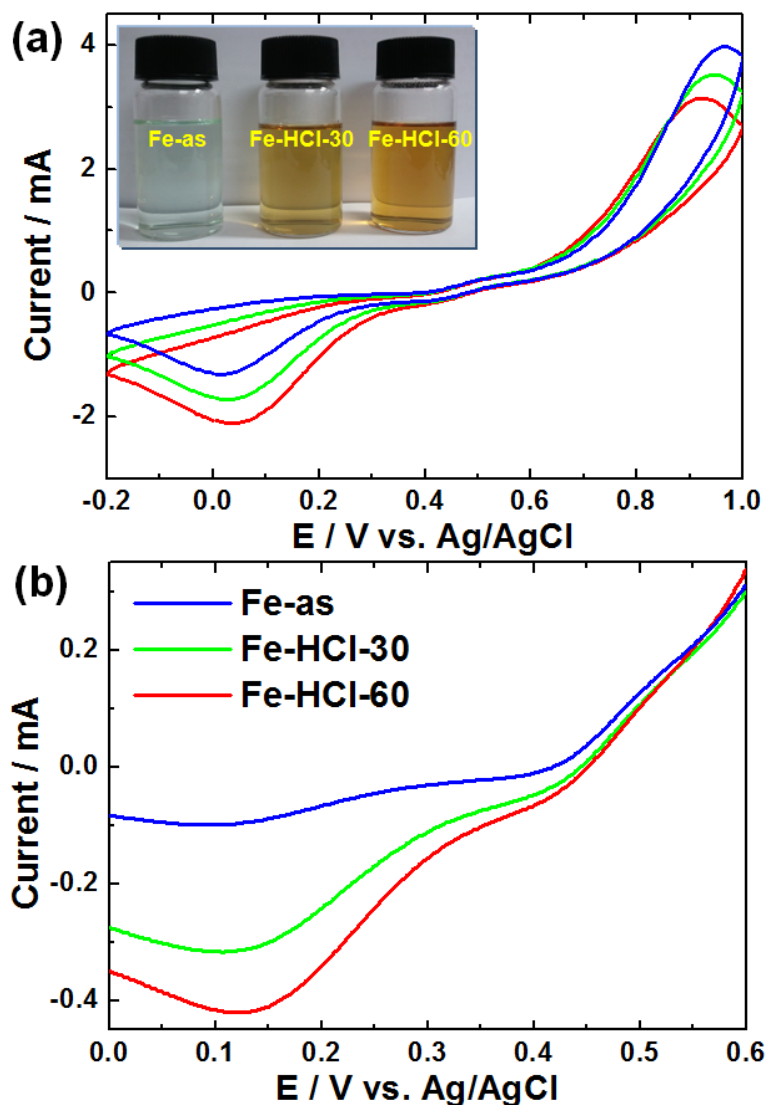

**Figure S2.** Electrochemical reduction reactions on N-doped carbon in  $\text{Cl}_2$ -absorbed solutions for 30 and 60 min (referred to as Fe-HCl-30 and Fe-HCl-60, respectively). (a) CVs and (b) linear sweep voltammograms for iron reduction reactions in Fe-HCl-30 and Fe-HCl-60.
